# Supplementary material for: Triarylborane-“Click” Fluorescent Tag for Orthogonal Amino Acid Labelling, Interactions with DNA, Protein, and Cyclodextrins
Source: MDPI journal article supplement (doi:10.3390/ph16091208), 2023-08-25
Supplement: s1 [file s1]

# ***Triarylborane-“click” fluorescent tag for orthogonal amino acid labelling, interactions with DNA, protein and cyclodextrins***

Marta Jurković <sup>1</sup>, Matthias Ferger <sup>2</sup>, Isabela Drašković <sup>3</sup>, Todd B. Marder <sup>2\*</sup>, Ivo Piantanida <sup>1\*</sup>

<sup>1</sup> Division of Organic Chemistry and Biochemistry, Ruđer Bošković Institute, Bijenička Cesta 54, 10000 Zagreb, Croatia; M.K. [marta.koscak@irb.hr](mailto:marta.koscak@irb.hr)

<sup>2</sup> Institut für Anorganische Chemie, and Institute for Sustainable Chemistry & Catalysis with Boron, Julius-Maximilians-Universität Würzburg, Am Hubland, 97074 Würzburg, Germany

<sup>3</sup> Division of Molecular Biology, Ruđer Bošković Institute, Bijenička Cesta 54, 10000 Zagreb, Croatia; I.D. [isabela.pehar@irb.hr](mailto:isabela.pehar@irb.hr);

\* Correspondence: I.P. [pianta@irb.hr](mailto:pianta@irb.hr); T.B.M. [todd.marder@uni-wuerzburg.de](mailto:todd.marder@uni-wuerzburg.de)

## **Contents**

|                                                                                  |    |
|----------------------------------------------------------------------------------|----|
| 1. Spectrophotometric properties.....                                            | 2  |
| 2. Non-covalent interactions of TB-p and TB-AA with ds-DNA, ds-RNA, and BSA..... | 7  |
| 3. Thermal denaturation experiments .....                                        | 9  |
| 4. Circular dichroism (CircD) experiments.....                                   | 11 |
| 5. Interactions with DNA, RNA, BSA.....                                          | 12 |
| 6. Interactions of TB-AA with cyclodextrins.....                                 | 13 |
| 7. NMR and HRMS data .....                                                       | 14 |

## 1. Spectrophotometric properties

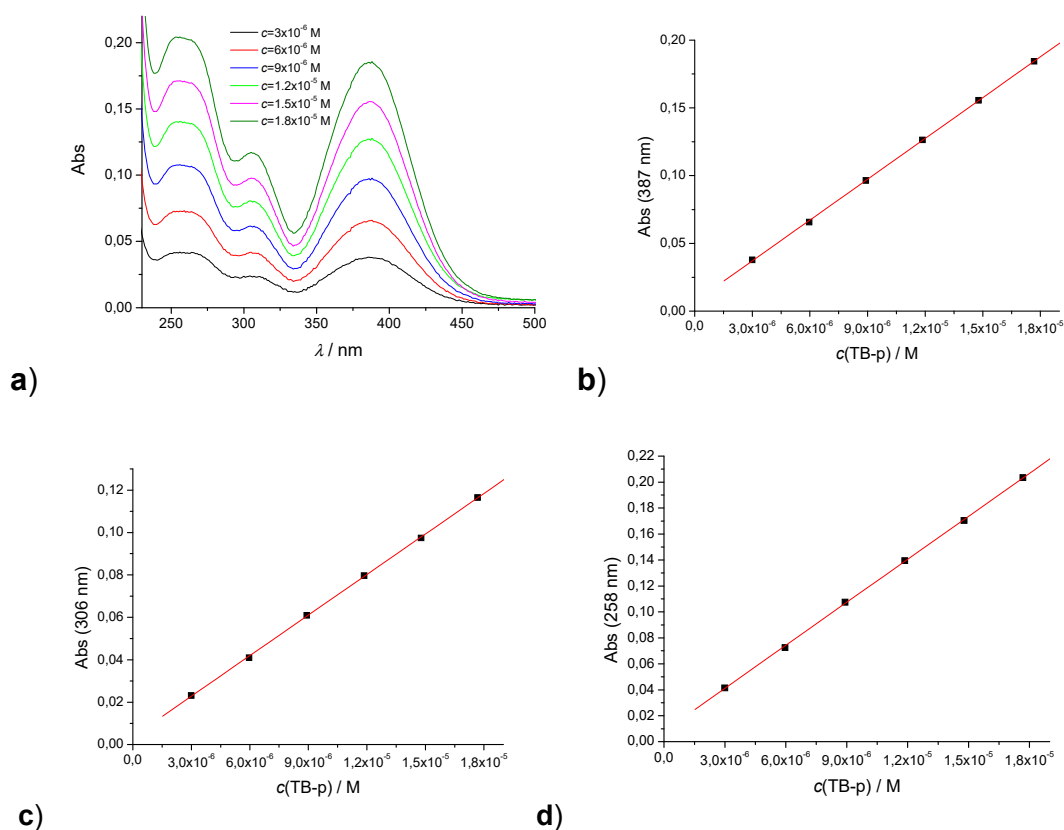

**Figure S1. a)** Dependence of UV/Vis spectra on concentration of **TB-p**; **b)** Dependence of UV/Vis spectra on concentration increase of **TB-p** ( $c = 2 \times 10^{-5}$  M) at  $\lambda_{\max}=387$  nm and pH 7.0, sodium cacodylate buffer,  $I = 50$  mM; **c)** Dependence of UV/Vis spectra on concentration increase of **TB-p** ( $c = 2 \times 10^{-5}$  M) at  $\lambda_{\max} = 306$  nm and pH 7.0, sodium cacodylate buffer,  $I = 50$  mM; **d)** Dependence of UV/Vis spectra on concentration increase of **TB-p** ( $c = 2 \times 10^{-5}$  M) at  $\lambda_{\max} = 258$  nm and pH 7.0, sodium cacodylate buffer,  $I = 50$  mM.

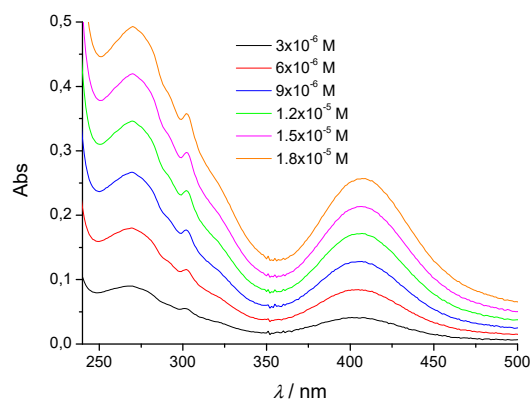

a)

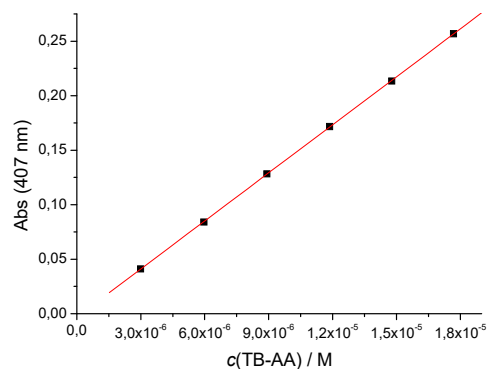

b)

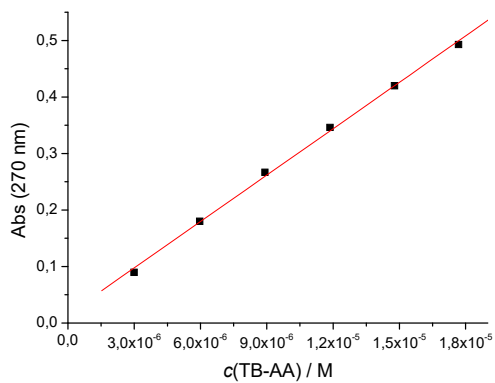

c)

**Figure S2. a)** Dependence of UV/Vis spectra on concentration of **TB-AA**; **b)** Dependence of UV/Vis spectra on concentration increase of **TB-AA** ( $c=1.8 \times 10^{-5}$  M) at  $\lambda_{\max}=407$  nm; **c)** Dependence of UV/Vis spectra on concentration increase of **MK-02** ( $c = 1.8 \times 10^{-5}$  M) at  $\lambda_{\max} = 270$  nm. Done at pH 7.0, sodium cacodylate buffer,  $I = 50$  mM.

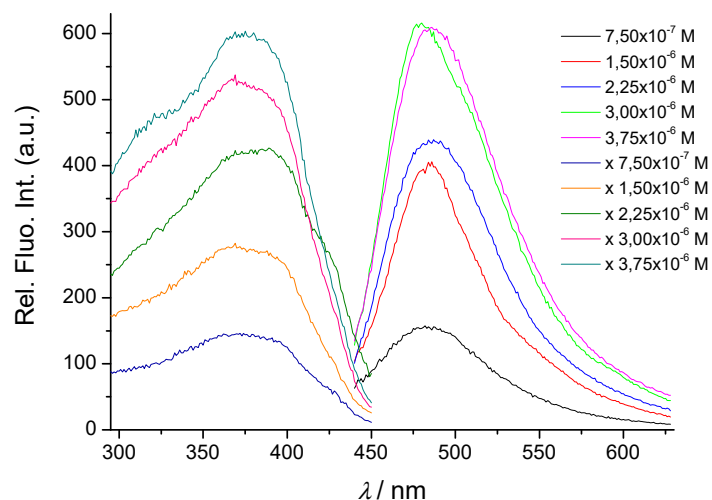

**Figure S3.** Dependence of fluorescence excitation and emission spectra on concentration increase of **TB-p** at  $\lambda_{\text{exc}} = 387$  nm and  $\lambda_{\text{em}} = 496$  nm. Done at pH 7.0, sodium cacodylate buffer,  $I = 50$  mM and with slits 20, 20.

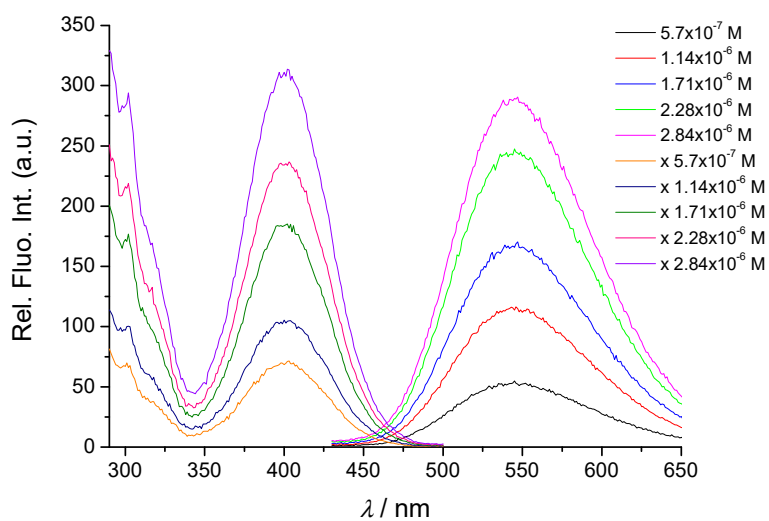

**Figure S4.** Dependence of fluorescence excitation and emission spectra on concentration increase of **TB-AA** at  $\lambda_{\text{exc}} = 407$  nm and  $\lambda_{\text{em}} = 547$  nm). Done at pH 7.0, sodium cacodylate buffer,  $I = 50$  mM with slits 5, 10.

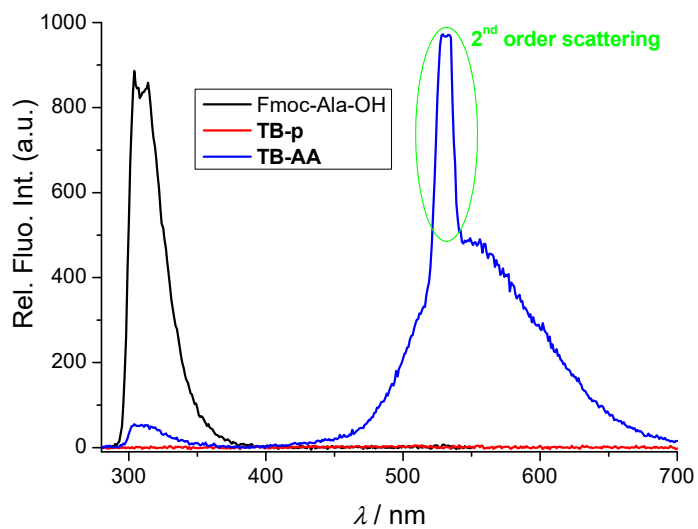

**Figure S5.** Emission spectra of **Fmoc-Ala-OH** ( $c=5 \times 10^{-7}$  M), **TB-p** ( $c=5 \times 10^{-6}$  M) and **TB-AA** ( $c=5 \times 10^{-6}$  M) at  $\lambda_{\text{exc}}=265$  nm and slits: 5-5 in sodium cacodylate buffer at pH 7.0,  $I=50$  mM. The baseline of the buffer subtracted from the spectra.

**Table S1.** Electronic absorption and emission data of **TB-p** and **TB-AA** at pH 7, sodium cacodylate buffer,  $I = 50$  mM.

| Compound     | $\lambda_{\text{max}} / \text{nm}$ | $\varepsilon / \text{mol}^{-1} \text{cm}^2$ | $^a\Phi_f$      | $^b\lambda_{\text{exc}} / \text{nm}$ | $^b\lambda_{\text{em}} / \text{nm}$ | $^b\tau / \text{ns}$ | $\chi^2$ |
|--------------|------------------------------------|---------------------------------------------|-----------------|--------------------------------------|-------------------------------------|----------------------|----------|
| <b>TB-p</b>  | 387                                | 10036.93                                    | $0.15 \pm 0.05$ | 405                                  | 485                                 | c                    | c        |
|              | 306                                | 6371.61                                     |                 |                                      |                                     |                      |          |
|              | 258                                | 11037.06                                    |                 |                                      |                                     |                      |          |
| <b>TB-AA</b> | 407                                | 14689.87                                    | $0.07 \pm 0.05$ | 405                                  | 547                                 | 1.30<br>(31.82 %)    | 1.105    |
|              | 270                                | 27378.65                                    |                 |                                      |                                     | 6.39<br>(68.18 %)    |          |

<sup>a</sup> The measurements were performed three times and the average values are reported. The associated errors correspond to the maximum absolute deviation. Absolute fluorescence quantum yield was determined by integrating sphere SC-30, Edinburgh Inst., for Argon purged solutions, by  $\lambda_{\text{exc}} = 387$  nm (**TB-p**) / 407nm (**TB-AA**).

<sup>b</sup> Water solutions were purged by Argon, samples were excited by pulsing diodes at 405 nm.

<sup>c</sup> It was not possible to obtain the fluorescence lifetime decay due to inappropriate excitation wavelength.

## 2. Non-covalent interactions of TB-p and TB-AA with ds-DNA, ds-RNA, and BSA

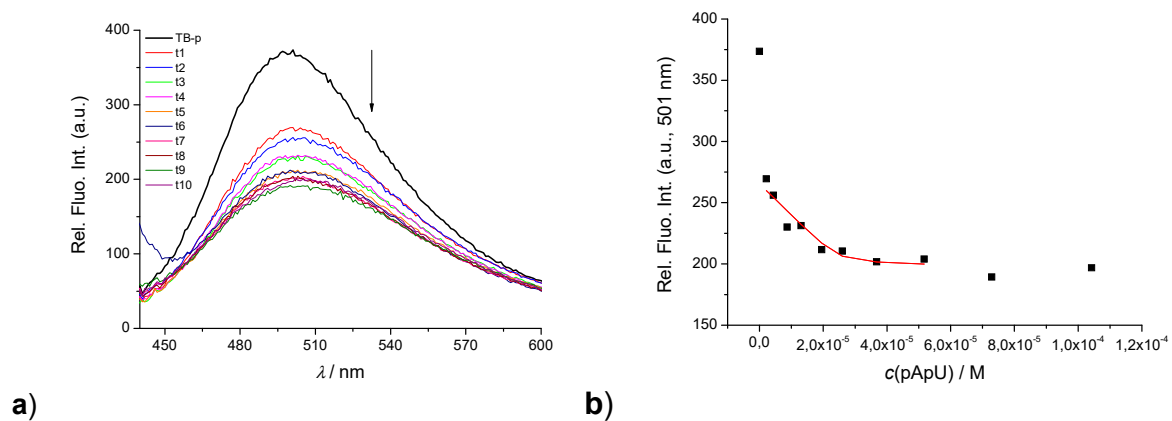

**Figure S6. a)** Changes in fluorescence spectrum of **TB-p** ( $c = 5.00 \times 10^{-6}$  M) on  $\lambda_{\text{exc}} = 387$  nm upon titration with pApU; **b)** Dependence of **TB-p** intensity at  $\lambda_{\text{max}} = 501$  nm on  $c(\text{pApU})$ , at pH 7.0, sodium cacodylate buffer,  $I = 0.05$  M.

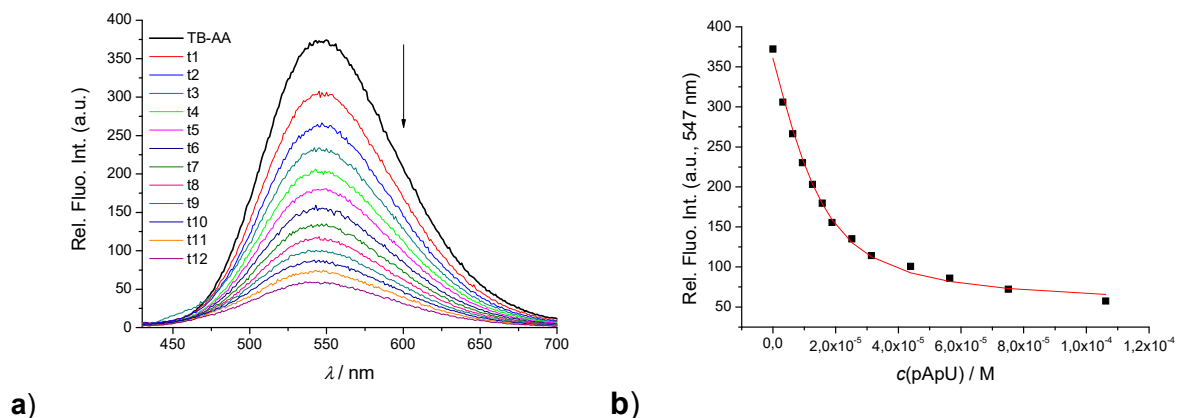

**Figure S7. a)** Fluorimetric titrations **TB-AA** ( $c = 3 \times 10^{-6}$  M;  $\lambda_{\text{exc}} = 407$  nm) with poly A – poly U; **b)** Dependence of emission intensity at  $\lambda_{\text{max}} = 547$  nm on  $c(\text{pApU})$ . Done at pH = 7.0, buffer sodium cacodylate,  $I = 0.05$  M.

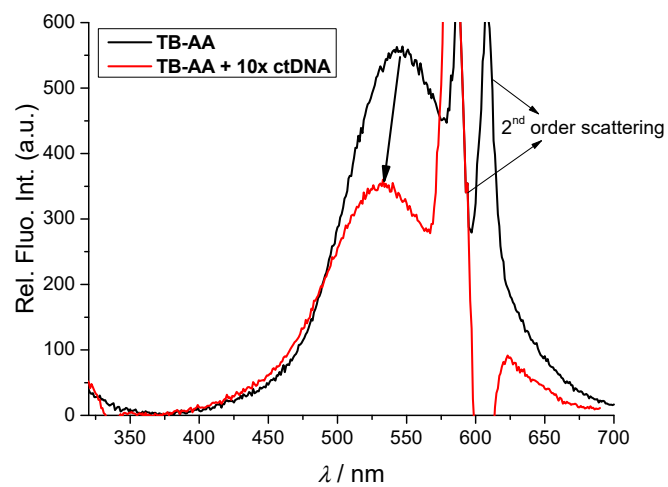

**Figure S8.** Emission spectra of **TB-AA** ( $c=1 \times 10^{-6}$  M) and complex of **TB-AA** with 10 times excess ct-DNA,  $\lambda_{\text{exc}}=300$  nm, slits: 10-10. The baseline of the buffer subtracted from the spectra.



### 3. Thermal denaturation experiments

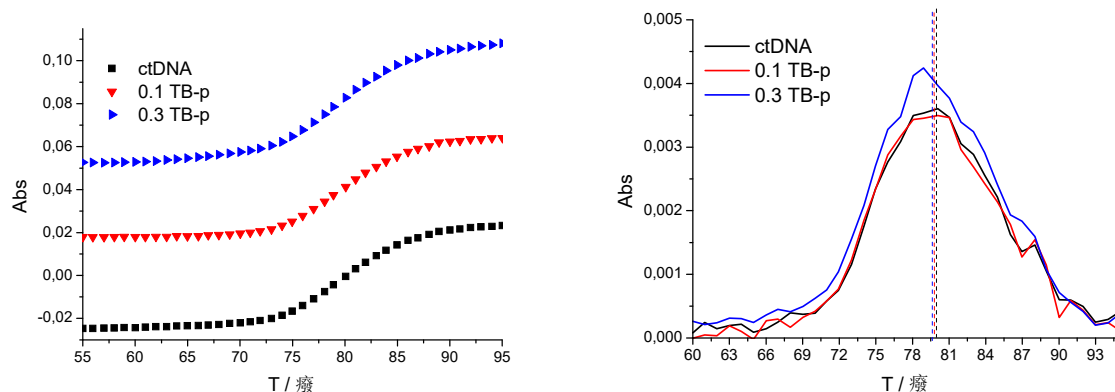

**a)** **b)**  
**Figure S9.** **a)** Melting curve of ctDNA upon addition  $r = 0.1$  and  $r = 0.3$  ([compound / [polynucleotide)] of **TB-p** at pH 7.0 (buffer sodium cacodylate,  $I = 0.05$  M); **b)** first derivation of absorbance on temperature.

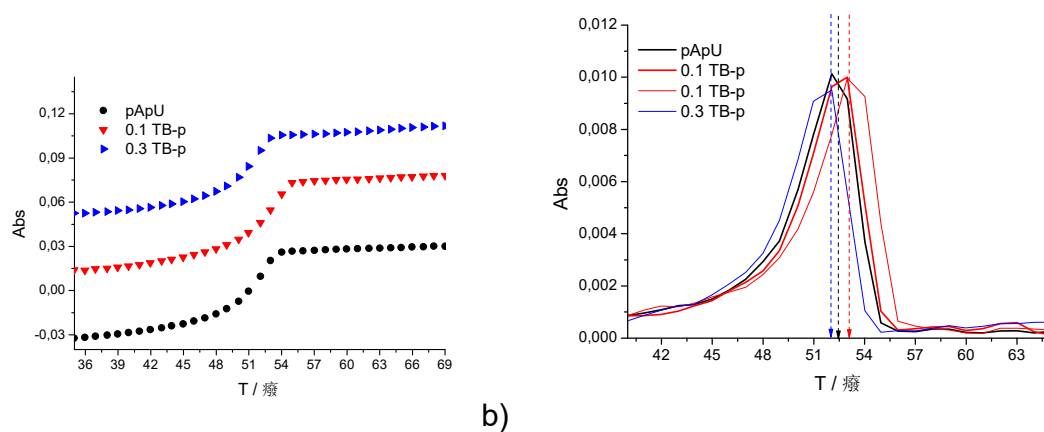

**a)** **b)**  
**Figure S10.** **a)** Melting curve of pApU upon addition  $r = 0.1$  and  $r = 0.3$  ([compound / [polynucleotide)] of **TB-p** at pH 7.0 (buffer sodium cacodylate,  $I = 0.05$  M); **b)** first derivation of absorbance on temperature.

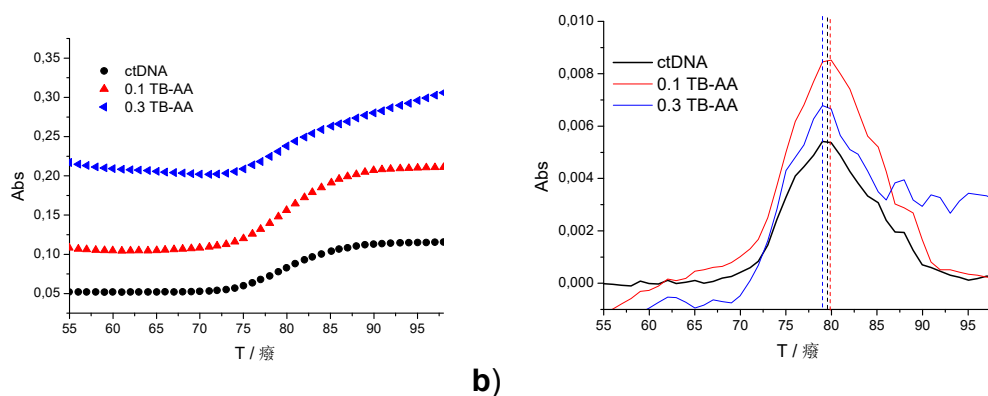

**Figure S11.** **a)** Melting curve of ctDNA upon addition  $r = 0.1$  and  $r = 0.3$  ([compound] / [polynucleotide]) of **TB-AA** at pH 7.0 (buffer sodium cacodylate,  $I = 0.05$  M); **b)** first derivation of absorbance on temperature.

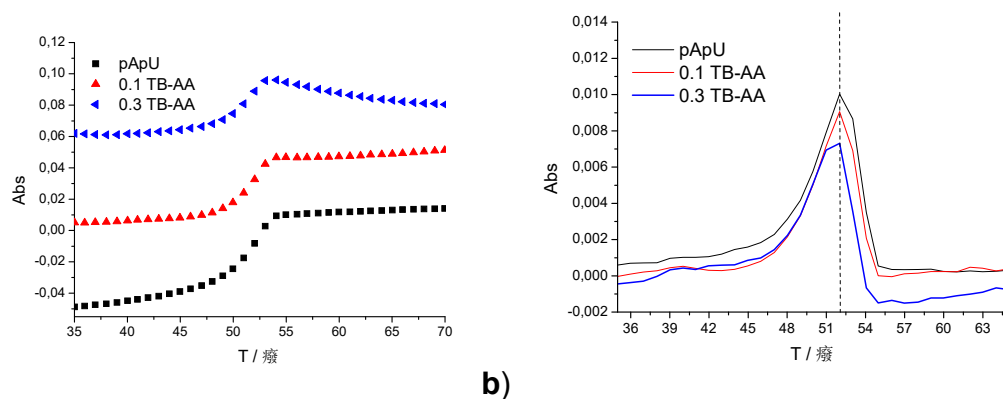

**Figure S12.** **a)** Melting curve of pApU upon addition  $r = 0.1$  and  $r = 0.3$  ([compound] / [polynucleotide]) of **TB-AA** at pH 7.0 (buffer sodium cacodylate,  $I = 0.05$  M); **b)** first derivation of absorbance on temperature.

**Table S2.**  $\Delta T_m$  - Values<sup>a</sup> (°C) for different ratios <sup>b</sup> $r$  of **TB-p** and **TB-AA** added to polynucleotide.

|              | <sup>b</sup> $r$ | ctDNA | pApU |
|--------------|------------------|-------|------|
| <b>TB-p</b>  | 0.1              | -0.6  | 1.0  |
|              | 0.3              | -1.2  | 0    |
| <b>TB-AA</b> | 0.1              | 0     | 0    |
|              | 0.3              | -0.5  | 0    |

<sup>a</sup> $\Delta T_m$ -Values

<sup>b</sup> $r = [\text{compound}] / [\text{polynucleotide}]$

#### 4. Circular dichroism (CircD) experiments

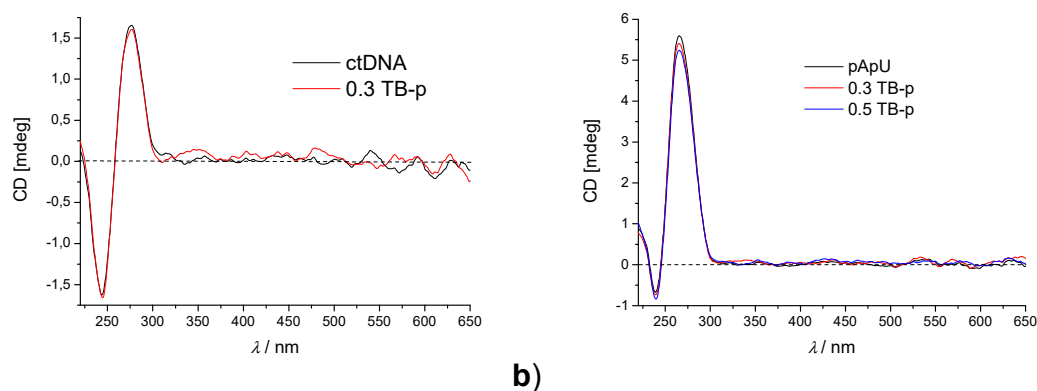

**Figure S13.** CD titration of **a)** ctDNA, **b)** pApU ( $c = 2 \times 10^{-5}$  M) with **TB-p** at molar ratio  $r = [\text{compound}] / [\text{polynucleotide}]$  (pH 7.0, buffer sodium cacodylate,  $I = 0.05$  M).

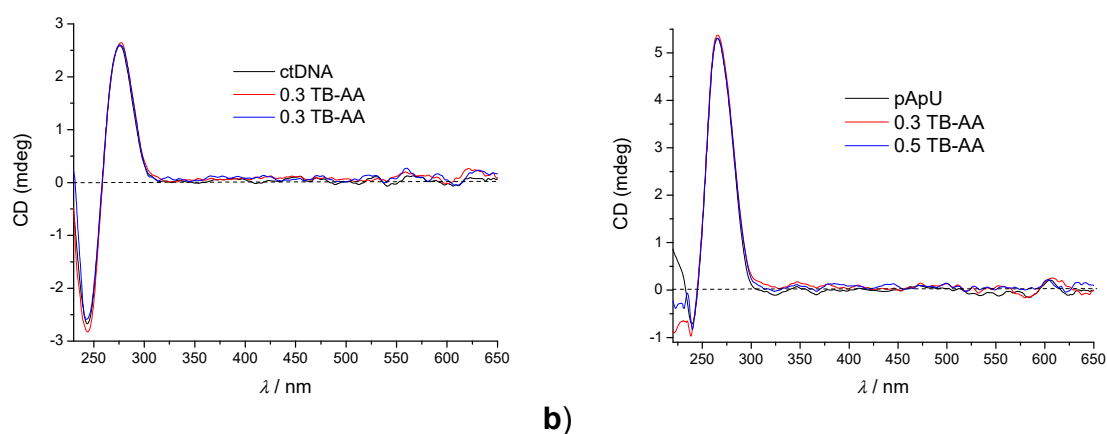

**Figure S14.** CD titration of **a)** ctDNA, **b)** pApU ( $c = 2 \times 10^{-5}$  M) with **TB-AA** at molar ratio  $r = [\text{compound}] / [\text{polynucleotide}]$  (pH 7.0, buffer sodium cacodylate,  $I = 0.05$  M).

## 5. Interactions with DNA, RNA, BSA

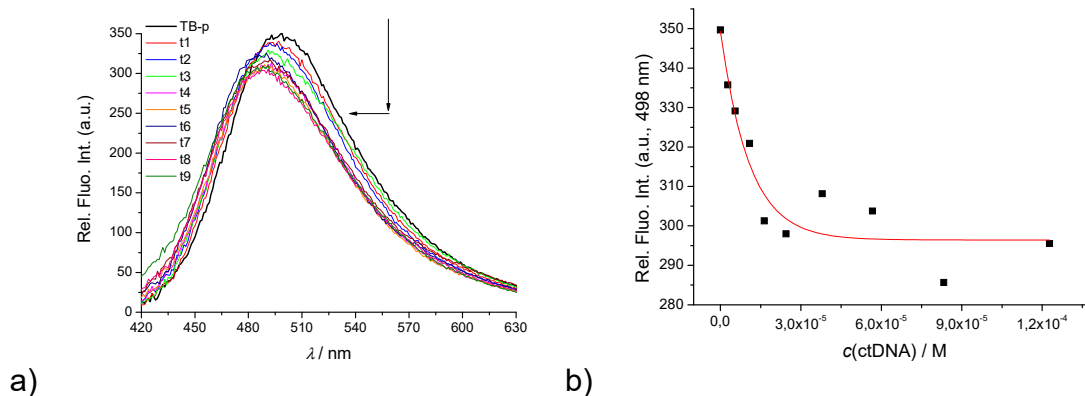

**Figure S15. a)** Fluorimetric titration of **TB-p** ( $c = 5.00 \times 10^{-6}$  M) on  $\lambda_{\text{exc}} = 387$  nm with ctDNA; **b)** Dependence of **TB-p** intensity at  $\lambda_{\text{max}} = 498$  nm on  $c(\text{ctDNA})$ , at pH 7.0, sodium cacodylate buffer,  $I = 0.05$  M.

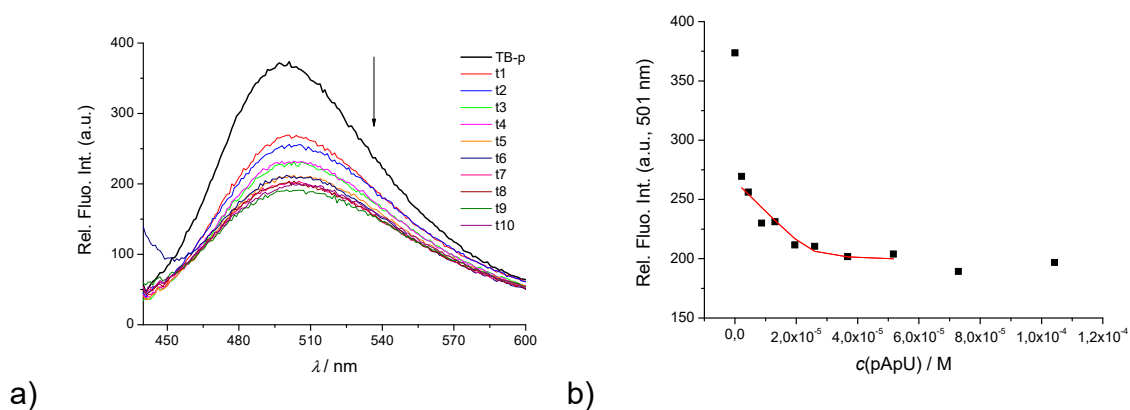

**Figure S16. a)** Fluorimetric titration of **TB-p** ( $c = 5.0 \times 10^{-6}$  M) on  $\lambda_{\text{exc}} = 387$  nm with pApU; **b)** Dependence of **TB-p** intensity at  $\lambda_{\text{max}} = 501$  nm on  $c(\text{pApU})$ , at pH 7.0, sodium cacodylate buffer,  $I = 0.05$  M.

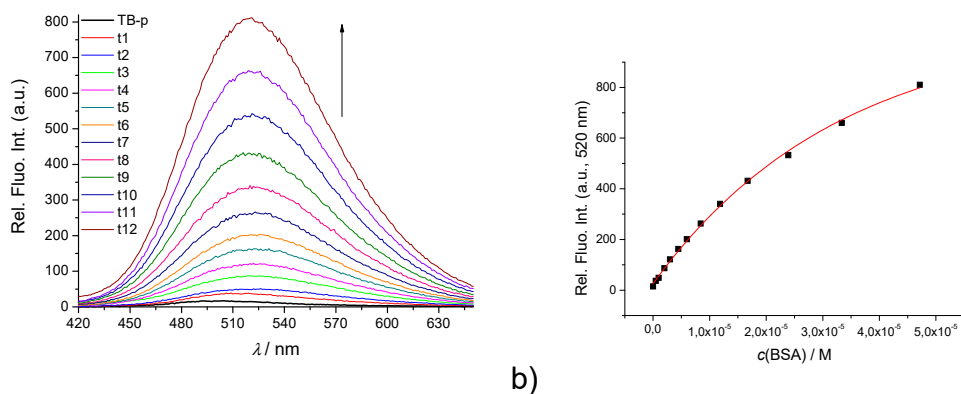

a)

b)

**Figure S17.** a) Fluorimetric titration of **TB-p** ( $c = 5.00 \times 10^{-6}$  M) on  $\lambda_{\text{exc}} = 387$  nm with BSA; b) Dependence of **TB-p** intensity at  $\lambda_{\text{max}} = 520$  nm on  $c(\text{BSA})$ , at pH 7.0, sodium cacodylate buffer,  $I = 0.05$  M.

## 6. Interactions of TB-AA with cyclodextrins

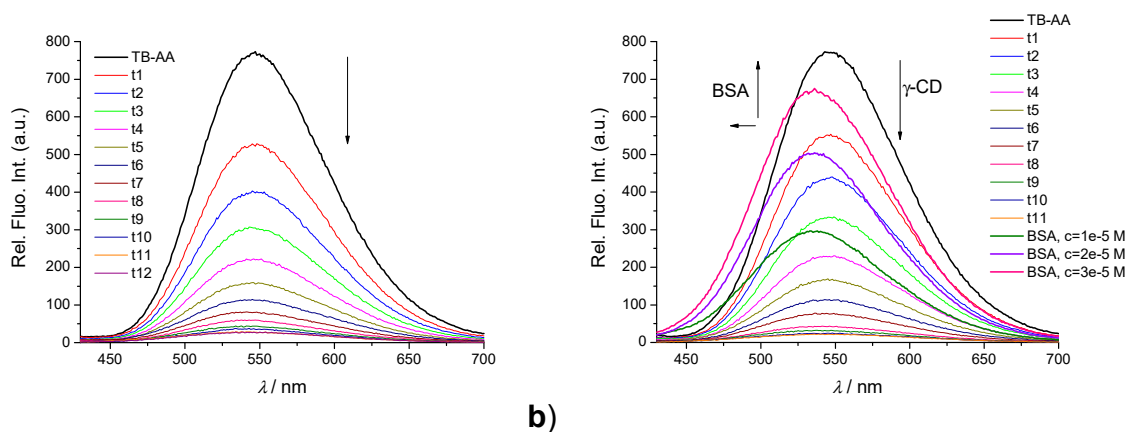

a)

b)

**Figure S18.** Fluorimetric titration of **TB-AA** ( $c = 3.00 \times 10^{-6}$  M) on  $\lambda_{\text{exc}} = 407$  nm with a) β-cyclodextrin; b) γ-cyclodextrin and competition with BSA, at pH 7.0, sodium cacodylate buffer,  $I = 0.05$  M.

## 7. NMR and HRMS data

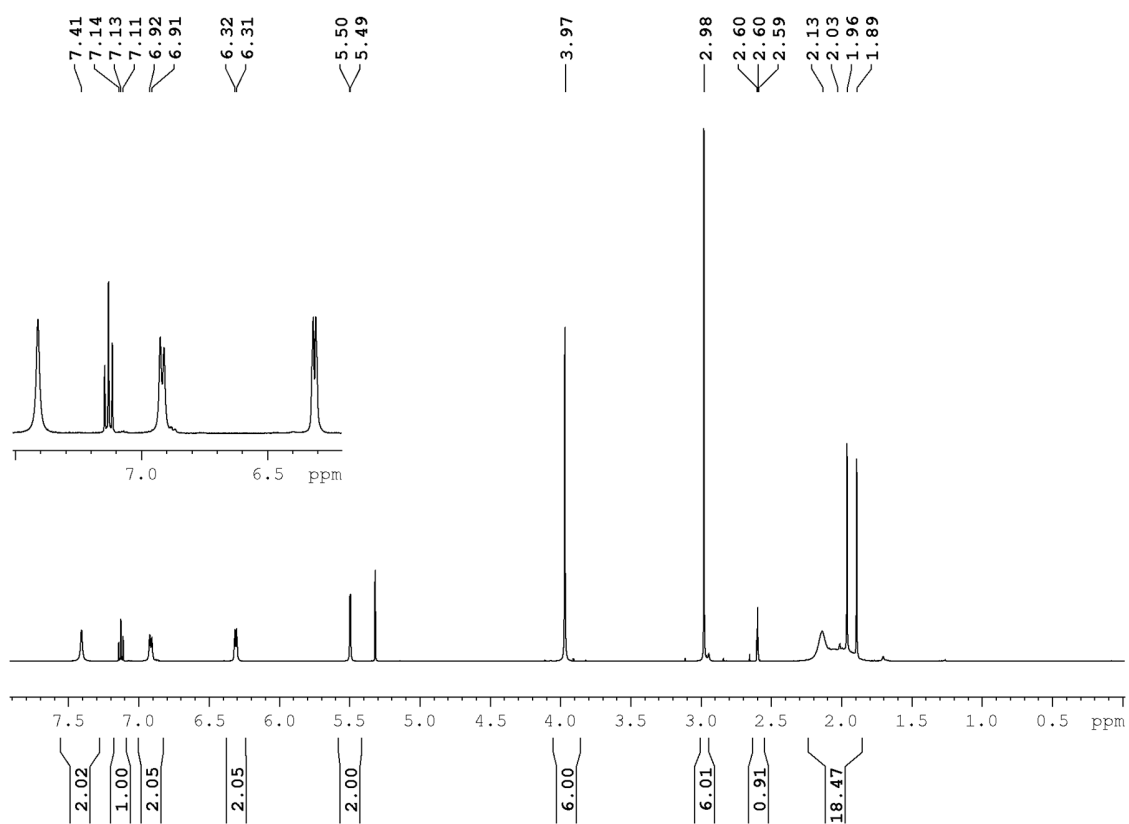

**Figure S19.** <sup>1</sup>H NMR spectrum of **TB-p** in CD<sub>2</sub>Cl<sub>2</sub> at 500 MHz.

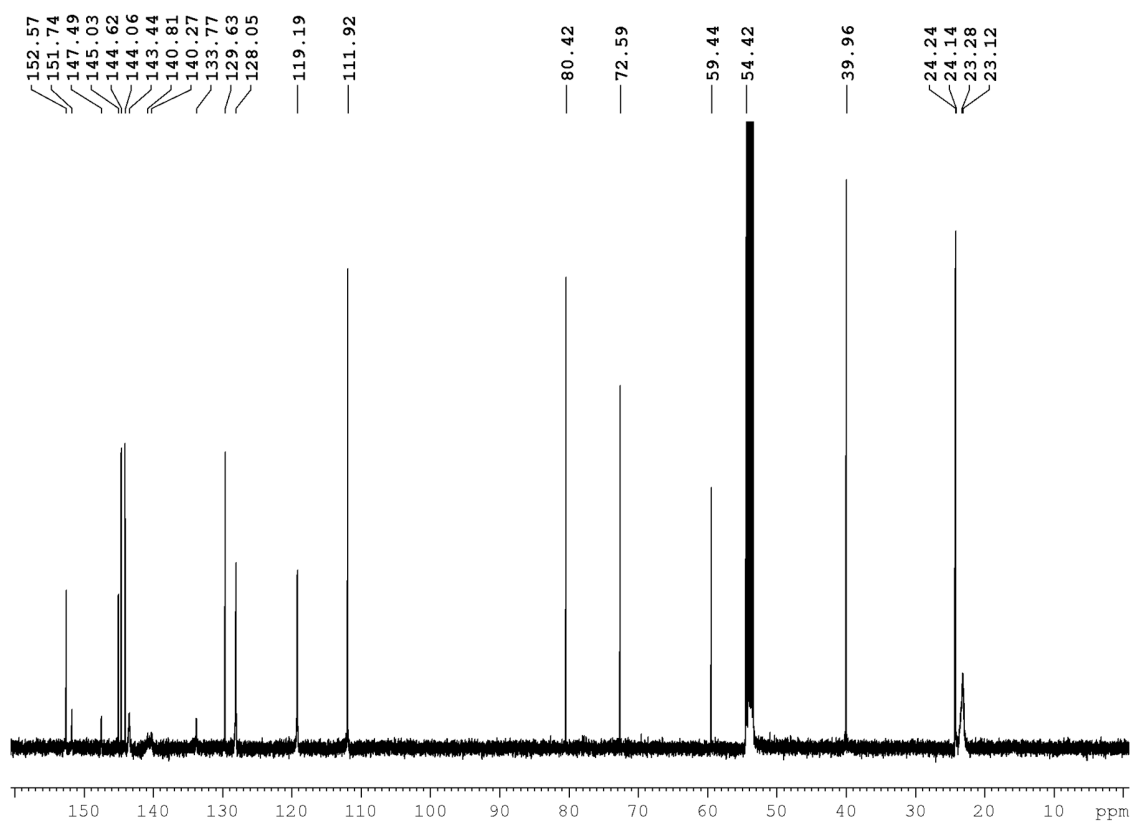

**Figure S20.**  $^{13}\text{C}\{^1\text{H}\}$  NMR spectrum of **TB-p** in  $\text{CD}_2\text{Cl}_2$  at 125 MHz.

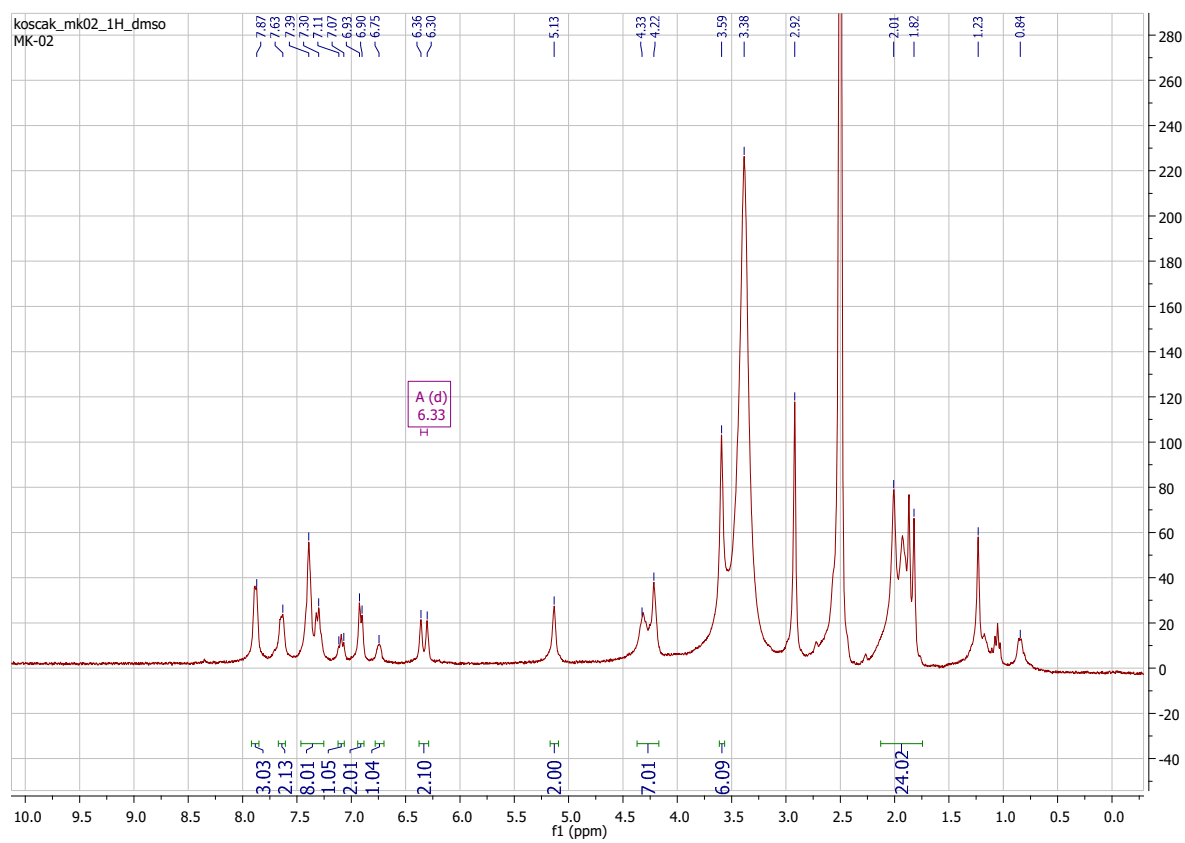

**Figure S21.**  $^1\text{H}$  NMR spectrum of **TB-AA** in DMSO at 300 MHz.

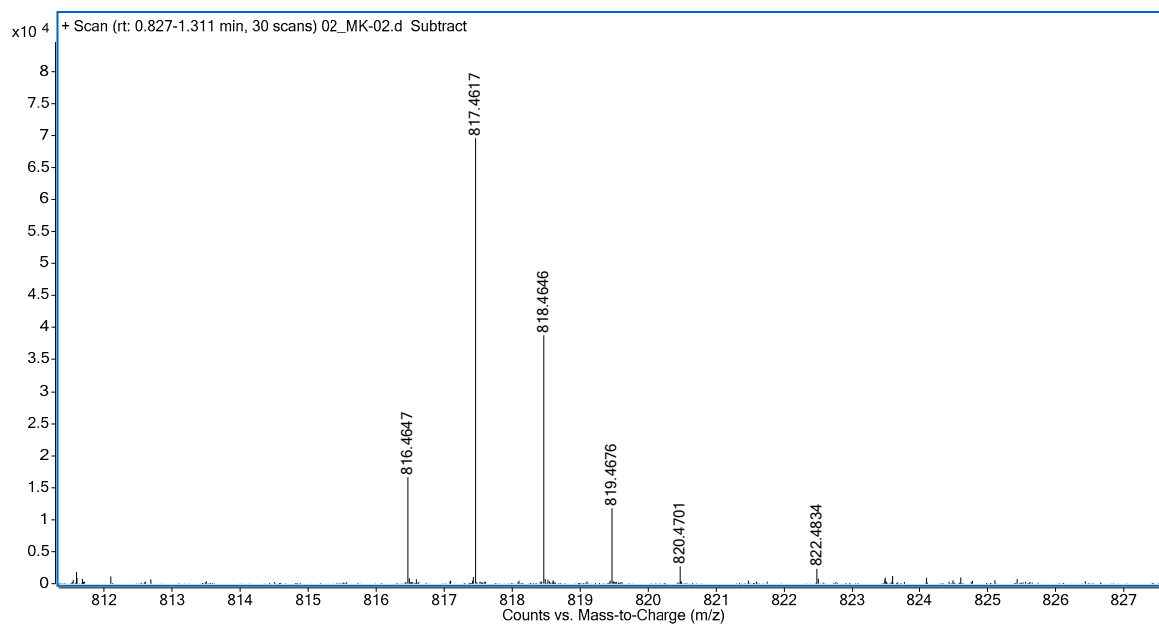

**Figure S22.** HRMS analysis of **TB-AA** in MeOH at LC/Q-TOF.
